# Supplementary material
Source: publisher site journal article supplement (https://www.dovepress.com/article/439779)
Supplement: Supplementary file 1 [file get_supplementary_file.php]

# Supplementary Materials

## 1. Supplementary Tables

(1) Supplementary Table S1. Basic information of GEO datasets

| GEO      | Type    | Platform | Tissue      | Samples |     |       | Country |
|----------|---------|----------|-------------|---------|-----|-------|---------|
|          |         |          |             | HC      | SLE | Total |         |
| GSE50772 | Array   | GPL570   | PBMC        | 20      | 61  | 81    | USA     |
| GSE61635 | Array   | GPL570   | whole blood | 30      | 99  | 129   | USA     |
| GSE72509 | RNA-seq | GPL16791 | whole blood | 18      | 99  | 117   | USA     |
| GSE81622 | Array   | GPL10558 | PBMC        | 25      | 30  | 55    | USA     |

(2) Supplementary Table S2. SNPs

| chr<br>.exposure | pos<br>.exposure | beta<br>.exposure | se<br>.exposure | pval<br>.exposure | samplesize<br>.exposure | id<br>.exposure    | SNP         | effect_allele<br>.exposure | other_allele<br>.exposure | eaf<br>.exposure | exposure              | mr_keep<br>.exposure | pval_origin<br>.exposure | data_source<br>.exposure | R <sup>2</sup>         | F                    |
|------------------|------------------|-------------------|-----------------|-------------------|-------------------------|--------------------|-------------|----------------------------|---------------------------|------------------|-----------------------|----------------------|--------------------------|--------------------------|------------------------|----------------------|
| 1                | 18610402         | -0.198716         | 0.0480609       | 4.23331e-05       | 1323                    | ebi-a-GCST90010240 | rs223191    | C                          | A                         | 0.238            | id:ebi-a-GCST90010240 | True                 | reported                 | igd                      | 0.01275692<br>86040295 | 17.0696591<br>084648 |
| 1                | 237131148        | 0.503608          | 0.119511        | 3.1291e-05        | 1323                    | ebi-a-GCST90010240 | rs6428982   | T                          | C                         | 0.029            | id:ebi-a-GCST90010240 | True                 | reported                 | igd                      | 0.01324400<br>72130605 | 17.7301517<br>866033 |
| 1                | 196774718        | -0.175053         | 0.0402729       | 1.74389e-05       | 1323                    | ebi-a-GCST90010240 | rs365299    | T                          | C                         | 0.255            | id:ebi-a-GCST90010240 | True                 | reported                 | igd                      | 0.01407975<br>98287891 | 18.8649770<br>802966 |
| 1                | 108044081        | -0.220913         | 0.0504561       | 1.51824e-05       | 1323                    | ebi-a-GCST90010240 | rs11185124  | A                          | C                         | 0.2              | id:ebi-a-GCST90010240 | True                 | reported                 | igd                      | 0.01428261<br>60327328 | 19.1407152<br>659758 |
| 1                | 36650692         | -0.160508         | 0.0359093       | 1.00339e-05       | 1323                    | ebi-a-GCST90010240 | rs114480320 | A                          | T                         | 0.328            | id:ebi-a-GCST90010240 | True                 | reported                 | igd                      | 0.01487682<br>24852152 | 19.9490611<br>443607 |
| 2                | 43104586         | -0.263048         | 0.0533326       | 1.13164e-06       | 1323                    | ebi-a-GCST90010240 | rs112016221 | T                          | G                         | 0.169            | id:ebi-a-GCST90010240 | True                 | reported                 | igd                      | 0.01805558<br>46575571 | 24.2899974<br>377012 |
| 2                | 65917987         | 0.820959          | 0.197145        | 3.6857e-05        | 1323                    | ebi-a-GCST90010240 | rs873028    | T                          | C                         | 0.011            | id:ebi-a-GCST90010240 | True                 | reported                 | igd                      | 0.01293767<br>19699523 | 17.3146762<br>742086 |
| 2                | 160375434        | 0.531664          | 0.124573        | 2.36881e-05       | 1323                    | ebi-a-GCST90010240 | rs10178388  | A                          | G                         | 0.025            | id:ebi-a-GCST90010240 | True                 | reported                 | igd                      | 0.01358089<br>19600493 | 18.1873588<br>345965 |
| 2                | 164579523        | -0.191384         | 0.0456086       | 3.26002e-05       | 1323                    | ebi-a-GCST90010240 | rs7606895   | C                          | T                         | 0.278            | id:ebi-a-GCST90010240 | True                 | reported                 | igd                      | 0.01313457<br>01217064 | 17.5816951<br>384283 |
| 2                | 180146469        | -0.2589           | 0.0600773       | 2.07248e-05       | 1323                    | ebi-a-GCST90010240 | rs34358481  | A                          | C                         | 0.13             | id:ebi-a-GCST90010240 | True                 | reported                 | igd                      | 0.01384297<br>75858049 | 18.5432674<br>261966 |
| 2                | 45409872         | -0.27191          | 0.0649764       | 3.4412e-05        | 1323                    | ebi-a-GCST90010240 | rs17033130  | A                          | G                         | 0.102            | id:ebi-a-GCST90010240 | True                 | reported                 | igd                      | 0.01306376<br>37818261 | 17.4856604<br>940558 |
| 2                | 66255387         | 1.72735           | 0.379595        | 7.08044e-06       | 1323                    | ebi-a-GCST90010240 | rs115134733 | A                          | G                         | 0.003            | id:ebi-a-GCST90010240 | True                 | reported                 | igd                      | 0.01541044<br>22858801 | 20.6758177<br>558881 |

| chr       | pos       | beta      | se        | pval        | samplesize | id                 | SNP         | effect_allele | other_allele | eaf       | exposure              | mr_keep   | pval_origin | data_source | R <sup>2</sup>         | F                    |
|-----------|-----------|-----------|-----------|-------------|------------|--------------------|-------------|---------------|--------------|-----------|-----------------------|-----------|-------------|-------------|------------------------|----------------------|
| .exposure | .exposure | .exposure | .exposure | .exposure   | .exposure  | .exposure          |             | .exposure     | .exposure    | .exposure |                       | .exposure | .exposure   | .exposure   |                        |                      |
| 3         | 24369366  | -0.251771 | 0.0591955 | 2.53881e-05 | 1323       | ebi-a-GCST90010240 | rs17014539  | G             | A            | 0.134     | id:ebi-a-GCST90010240 | True      | reported    | igd         | 0.01348888<br>83645775 | 18.0624640<br>91324  |
| 3         | 131342120 | -0.258029 | 0.0625163 | 4.43803e-05 | 1323       | ebi-a-GCST90010240 | rs7643824   | T             | G            | 0.112     | id:ebi-a-GCST90010240 | True      | reported    | igd         | 0.01271259<br>63433563 | 17.0095756<br>386395 |
| 3         | 19936589  | 0.24251   | 0.05578   | 1.77615e-05 | 1323       | ebi-a-GCST90010240 | rs2931380   | A             | C            | 0.16      | id:ebi-a-GCST90010240 | True      | reported    | igd         | 0.01408580<br>13831991 | 18.8731875<br>991961 |
| 3         | 173952876 | 0.193546  | 0.0424867 | 6.87702e-06 | 1323       | ebi-a-GCST90010240 | rs1345534   | A             | G            | 0.361     | id:ebi-a-GCST90010240 | True      | reported    | igd         | 0.01544341<br>13260072 | 20.7207453<br>551566 |
| 4         | 139734379 | 1.51319   | 0.334532  | 7.72254e-06 | 1323       | ebi-a-GCST90010240 | rs141839722 | T             | G            | 0.003     | id:ebi-a-GCST90010240 | True      | reported    | igd         | 0.01522953<br>9093894  | 20.4293507<br>387729 |
| 4         | 165140204 | -0.176165 | 0.041667  | 2.87965e-05 | 1323       | ebi-a-GCST90010240 | rs6821978   | T             | C            | 0.625     | id:ebi-a-GCST90010240 | True      | reported    | igd         | 0.01333111<br>21161702 | 17.8483372<br>90974  |
| 4         | 184880036 | -0.762863 | 0.154297  | 1.06336e-06 | 1323       | ebi-a-GCST90010240 | rs17363675  | T             | C            | 0.017     | id:ebi-a-GCST90010240 | True      | reported    | igd         | 0.01814125<br>41406065 | 24.4073771<br>515531 |
| 4         | 4174495   | -0.493337 | 0.112003  | 1.3299e-05  | 1323       | ebi-a-GCST90010240 | rs142186348 | T             | C            | 0.033     | id:ebi-a-GCST90010240 | True      | reported    | igd         | 0.01445259<br>19843959 | 19.3718474<br>181048 |
| 4         | 70763844  | -0.602798 | 0.141715  | 2.63299e-05 | 1323       | ebi-a-GCST90010240 | rs11943648  | T             | G            | 0.021     | id:ebi-a-GCST90010240 | True      | reported    | igd         | 0.01349127<br>66798167 | 18.0657059<br>311715 |
| 4         | 121175593 | 0.178648  | 0.0429024 | 3.71809e-05 | 1323       | ebi-a-GCST90010240 | rs4250293   | G             | T            | 0.372     | id:ebi-a-GCST90010240 | True      | reported    | igd         | 0.01293654<br>69660873 | 17.3131509<br>323689 |
| 5         | 166984125 | -0.265085 | 0.0614797 | 2.10116e-05 | 1323       | ebi-a-GCST90010240 | rs6886928   | A             | G            | 0.13      | id:ebi-a-GCST90010240 | True      | reported    | igd         | 0.01385755<br>57765326 | 18.5630699<br>58128  |
| 5         | 21460904  | 0.865214  | 0.19546   | 1.27289e-05 | 1323       | ebi-a-GCST90010240 | rs187879548 | T             | G            | 0.011     | id:ebi-a-GCST90010240 | True      | reported    | igd         | 0.01459440<br>7420697  | 19.5647481<br>077079 |
| 5         | 14304025  | 0.687235  | 0.159691  | 2.04795e-05 | 1323       | ebi-a-GCST90010240 | rs114645804 | T             | C            | 0.014     | id:ebi-a-GCST90010240 | True      | reported    | igd         | 0.01380550<br>78238763 | 18.4923724<br>275715 |
| 5         | 11347020  | 0.392658  | 0.0710655 | 6.42081e-08 | 1323       | ebi-a-GCST90010240 | rs6881516   | G             | A            | 0.083     | id:ebi-a-GCST90010240 | True      | reported    | igd         | 0.02255504<br>68118808 | 30.4827568<br>461139 |
| 5         | 163854973 | -0.374292 | 0.087584  | 2.34985e-05 | 1323       | ebi-a-GCST90010240 | rs183875568 | G             | A            | 0.054     | id:ebi-a-GCST90010240 | True      | reported    | igd         | 0.01361625<br>26636768 | 18.2353671<br>350427 |
| 5         | 68320844  | 0.352946  | 0.0788824 | 1.02468e-05 | 1323       | ebi-a-GCST90010240 | rs114096895 | G             | T            | 0.073     | id:ebi-a-GCST90010240 | True      | reported    | igd         | 0.01490643<br>98949168 | 19.9893775<br>562644 |
| 5         | 53136710  | -1.20108  | 0.27422   | 1.49551e-05 | 1323       | ebi-a-GCST90010240 | rs150148097 | G             | C            | 0.005     | id:ebi-a-GCST90010240 | True      | reported    | igd         | 0.01429333<br>15581576 | 19.1552838<br>109263 |
| 5         | 165870095 | -0.895316 | 0.187235  | 2.84341e-06 | 1323       | ebi-a-GCST90010240 | rs72821475  | T             | G            | 0.012     | id:ebi-a-GCST90010240 | True      | reported    | igd         | 0.01698935<br>91087781 | 22.8308244<br>581652 |
| 5         | 9638133   | 1.26836   | 0.305535  | 3.90859e-05 | 1323       | ebi-a-GCST90010240 | rs74371106  | C             | T            | 0.004     | id:ebi-a-GCST90010240 | True      | reported    | igd         | 0.01285827<br>77902582 | 17.2070378<br>333397 |
| 5         | 38422991  | -0.237472 | 0.0558528 | 2.60154e-05 | 1323       | ebi-a-GCST90010240 | rs3935014   | A             | G            | 0.154     | id:ebi-a-GCST90010240 | True      | reported    | igd         | 0.01347972<br>68004719 | 18.0500285<br>571139 |
| 6         | 157119873 | -0.459491 | 0.11132   | 4.37603e-05 | 1323       | ebi-a-GCST90010240 | rs9383813   | G             | C            | 0.033     | id:ebi-a-GCST90010240 | True      | reported    | igd         | 0.01271424<br>71416425 | 17.0118128<br>672311 |
| 6         | 67971721  | -0.689357 | 0.164794  | 4.07043e-05 | 1323       | ebi-a-GCST90010240 | rs186293015 | T             | C            | 0.015     | id:ebi-a-GCST90010240 | True      | reported    | igd         | 0.01305386<br>73304518 | 17.4722390<br>338405 |
| 6         | 2592894   | 0.242219  | 0.0589519 | 4.65232e-05 | 1323       | ebi-a-GCST90010240 | rs73716778  | T             | A            | 0.13      | id:ebi-a-GCST90010240 | True      | reported    | igd         | 0.01259952<br>82944833 | 16.8563590<br>498024 |
| 6         | 106600243 | 0.263715  | 0.0562026 | 3.67528e-06 | 1323       | ebi-a-GCST90010240 | rs9480646   | A             | G            | 0.153     | id:ebi-a-GCST90010240 | True      | reported    | igd         | 0.01636926<br>19859039 | 21.9836512<br>297658 |
| 6         | 46895270  | 0.528696  | 0.127676  | 4.44877e-05 | 1323       | ebi-a-GCST90010240 | rs150110122 | C             | G            | 0.024     | id:ebi-a-GCST90010240 | True      | reported    | igd         | 0.01279502<br>10871006 | 17.1212901<br>242378 |
| 6         | 31713823  | 0.556075  | 0.113023  | 1.19454e-06 | 1323       | ebi-a-GCST90010240 | rs12177823  | A             | G            | 0.028     | id:ebi-a-GCST90010240 | True      | reported    | igd         | 0.01796796<br>49056328 | 24.1699667<br>547608 |

| chr       | pos       | beta      | se        | pval        | samplesize | id                 | SNP         | effect_allele | other_allele | eaf       | exposure              | mr_keep   | pval_origin | data_source | R <sup>2</sup>         | F                    |
|-----------|-----------|-----------|-----------|-------------|------------|--------------------|-------------|---------------|--------------|-----------|-----------------------|-----------|-------------|-------------|------------------------|----------------------|
| .exposure | .exposure | .exposure | .exposure | .exposure   | .exposure  | .exposure          |             | .exposure     | .exposure    | .exposure |                       | .exposure | .exposure   | .exposure   |                        |                      |
| 6         | 70136445  | -0.680283 | 0.149876  | 7.23852e-06 | 1323       | ebi-a-GCST90010240 | rs7762967   | T             | C            | 0.019     | id:ebi-a-GCST90010240 | True      | reported    | igd         | 0.01533360<br>67269333 | 20.5711240<br>11807  |
| 6         | 37934825  | -0.986524 | 0.197162  | 8.49533e-07 | 1323       | ebi-a-GCST90010240 | rs150755111 | A             | G            | 0.011     | id:ebi-a-GCST90010240 | True      | reported    | igd         | 0.01857236<br>95610519 | 24.9983793<br>294841 |
| 6         | 43429666  | -0.990032 | 0.187041  | 1.85323e-07 | 1323       | ebi-a-GCST90010240 | rs148608708 | C             | G            | 0.012     | id:ebi-a-GCST90010240 | True      | reported    | igd         | 0.02073786<br>06850636 | 27.9748525<br>600445 |
| 7         | 143863872 | 0.397321  | 0.0963834 | 4.40859e-05 | 1323       | ebi-a-GCST90010240 | rs117133027 | C             | T            | 0.043     | id:ebi-a-GCST90010240 | True      | reported    | igd         | 0.01268165<br>45178059 | 16.9676434<br>09725  |
| 7         | 49570175  | -0.178895 | 0.0430502 | 4.27189e-05 | 1323       | ebi-a-GCST90010240 | rs34559849  | C             | G            | 0.328     | id:ebi-a-GCST90010240 | True      | reported    | igd         | 0.01288410<br>80355228 | 17.2420552<br>170971 |
| 7         | 13291280  | -0.708906 | 0.167507  | 2.76204e-05 | 1323       | ebi-a-GCST90010240 | rs71538826  | T             | C            | 0.016     | id:ebi-a-GCST90010240 | True      | reported    | igd         | 0.01335708<br>04710486 | 17.8835756<br>614756 |
| 7         | 22466398  | -0.590489 | 0.143577  | 4.57741e-05 | 1323       | ebi-a-GCST90010240 | rs117887153 | C             | T            | 0.021     | id:ebi-a-GCST90010240 | True      | reported    | igd         | 0.01262341<br>48250626 | 16.8887243<br>573365 |
| 7         | 14204690  | 0.190804  | 0.0429821 | 1.19138e-05 | 1323       | ebi-a-GCST90010240 | rs12699572  | A             | G            | 0.351     | id:ebi-a-GCST90010240 | True      | reported    | igd         | 0.01467637<br>30435098 | 19.6762649<br>956557 |
| 7         | 34073022  | 0.566033  | 0.128261  | 1.26692e-05 | 1323       | ebi-a-GCST90010240 | rs79806142  | G             | A            | 0.026     | id:ebi-a-GCST90010240 | True      | reported    | igd         | 0.01450734<br>06617289 | 19.4463112<br>764453 |
| 8         | 136037060 | -0.431676 | 0.0850929 | 5.70309e-07 | 1323       | ebi-a-GCST90010240 | rs78720213  | C             | A            | 0.059     | id:ebi-a-GCST90010240 | True      | reported    | igd         | 0.01908105<br>72684153 | 25.6963909<br>59058  |
| 8         | 118284996 | 0.178631  | 0.0410105 | 1.61678e-05 | 1323       | ebi-a-GCST90010240 | rs1499438   | T             | A            | 0.521     | id:ebi-a-GCST90010240 | True      | reported    | igd         | 0.01413773<br>79905161 | 18.9437739<br>988186 |
| 9         | 5639516   | 0.289089  | 0.069574  | 3.84096e-05 | 1323       | ebi-a-GCST90010240 | rs79788701  | G             | A            | 0.097     | id:ebi-a-GCST90010240 | True      | reported    | igd         | 0.01288185<br>71226091 | 17.2390036<br>408035 |
| 10        | 97469387  | -0.22538  | 0.0494405 | 6.80644e-06 | 1323       | ebi-a-GCST90010240 | rs28445650  | A             | G            | 0.224     | id:ebi-a-GCST90010240 | True      | reported    | igd         | 0.01546452<br>43300912 | 20.7495180<br>670358 |
| 10        | 9076156   | -0.484165 | 0.0994245 | 1.52827e-06 | 1323       | ebi-a-GCST90010240 | rs117418264 | C             | T            | 0.041     | id:ebi-a-GCST90010240 | True      | reported    | igd         | 0.01760859<br>32742759 | 23.6778859<br>791194 |
| 10        | 53248340  | -0.609583 | 0.134106  | 7.09055e-06 | 1323       | ebi-a-GCST90010240 | rs80209163  | A             | C            | 0.023     | id:ebi-a-GCST90010240 | True      | reported    | igd         | 0.01537727<br>17116021 | 20.6306185<br>581738 |
| 11        | 11317059  | 0.353164  | 0.0850539 | 3.97384e-05 | 1323       | ebi-a-GCST90010240 | rs7109994   | C             | A            | 0.942     | id:ebi-a-GCST90010240 | True      | reported    | igd         | 0.01286416<br>09533996 | 17.2150133<br>216252 |
| 11        | 4917142   | 0.328406  | 0.0761113 | 1.93321e-05 | 1323       | ebi-a-GCST90010240 | rs12225511  | A             | G            | 0.073     | id:ebi-a-GCST90010240 | True      | reported    | igd         | 0.01387698<br>55772496 | 18.5894636<br>667389 |
| 12        | 89365305  | -0.262394 | 0.0616582 | 2.49833e-05 | 1323       | ebi-a-GCST90010240 | rs10858809  | G             | A            | 0.124     | id:ebi-a-GCST90010240 | True      | reported    | igd         | 0.01350397<br>45727798 | 18.0829419<br>996058 |
| 12        | 130096502 | 1.14005   | 0.246401  | 4.78267e-06 | 1323       | ebi-a-GCST90010240 | rs77114422  | T             | C            | 0.007     | id:ebi-a-GCST90010240 | True      | reported    | igd         | 0.01592326<br>00680903 | 21.3749860<br>111548 |
| 12        | 46239129  | -0.498231 | 0.117915  | 2.92099e-05 | 1323       | ebi-a-GCST90010240 | rs150091353 | C             | T            | 0.03      | id:ebi-a-GCST90010240 | True      | reported    | igd         | 0.01331502<br>69868198 | 17.8265111<br>263168 |
| 13        | 62098003  | -0.254178 | 0.0596154 | 2.4251e-05  | 1323       | ebi-a-GCST90010240 | rs11841647  | T             | C            | 0.135     | id:ebi-a-GCST90010240 | True      | reported    | igd         | 0.01355415<br>3387665  | 18.1510588<br>610568 |
| 13        | 33938363  | -0.512347 | 0.117392  | 1.56146e-05 | 1323       | ebi-a-GCST90010240 | rs182427332 | A             | G            | 0.03      | id:ebi-a-GCST90010240 | True      | reported    | igd         | 0.01419329<br>77632479 | 19.0192928<br>316566 |
| 13        | 40663271  | 0.526646  | 0.125366  | 3.24011e-05 | 1323       | ebi-a-GCST90010240 | rs117263512 | C             | T            | 0.024     | id:ebi-a-GCST90010240 | True      | reported    | igd         | 0.01316326<br>14256849 | 17.6206130<br>797798 |
| 14        | 46803894  | -0.648283 | 0.157078  | 4.54036e-05 | 1323       | ebi-a-GCST90010240 | rs114750813 | A             | G            | 0.017     | id:ebi-a-GCST90010240 | True      | reported    | igd         | 0.01271109<br>46597379 | 17.0075405<br>027739 |
| 14        | 77450706  | 2.34923   | 0.523616  | 9.34609e-06 | 1323       | ebi-a-GCST90010240 | rs117297158 | A             | G            | 0.002     | id:ebi-a-GCST90010240 | True      | reported    | igd         | 0.01498675<br>08354412 | 20.0987122<br>461643 |
| 14        | 40681548  | 0.340804  | 0.0785387 | 1.75934e-05 | 1323       | ebi-a-GCST90010240 | rs12147294  | C             | T            | 0.066     | id:ebi-a-GCST90010240 | True      | reported    | igd         | 0.01403280<br>75785062 | 18.8011720<br>407042 |

| chr       | pos       | beta      | se        | pval        | samplesize | id                 | SNP         | effect_allele | other_allele | eaf       | exposure              | mr_keep   | pval_origin | data_source | R <sup>2</sup>         | F                    |
|-----------|-----------|-----------|-----------|-------------|------------|--------------------|-------------|---------------|--------------|-----------|-----------------------|-----------|-------------|-------------|------------------------|----------------------|
| .exposure | .exposure | .exposure | .exposure | .exposure   | .exposure  | .exposure          |             | .exposure     | .exposure    | .exposure |                       | .exposure | .exposure   | .exposure   |                        |                      |
| 15        | 77381959  | -0.280339 | 0.063501  | 1.29885e-05 | 1323       | ebi-a-GCST90010240 | rs7402884   | G             | A            | 0.89      | id:ebi-a-GCST90010240 | True      | reported    | igd         | 0.01451760<br>37131324 | 19.4602710<br>076876 |
| 15        | 82339578  | -0.460252 | 0.109959  | 3.36636e-05 | 1323       | ebi-a-GCST90010240 | rs140983710 | A             | G            | 0.034     | id:ebi-a-GCST90010240 | True      | reported    | igd         | 0.01306942<br>7498463  | 17.4933416<br>863452 |
| 16        | 17501080  | 0.233762  | 0.0553252 | 2.89554e-05 | 1323       | ebi-a-GCST90010240 | rs12446686  | G             | T            | 0.161     | id:ebi-a-GCST90010240 | True      | reported    | igd         | 0.01331437<br>54714704 | 17.8256270<br>899017 |
| 17        | 43132719  | 0.180062  | 0.0405213 | 1.18424e-05 | 1323       | ebi-a-GCST90010240 | rs12602966  | C             | A            | 0.407     | id:ebi-a-GCST90010240 | True      | reported    | igd         | 0.01470562<br>73922241 | 19.7160709<br>785777 |
| 17        | 5687658   | 0.455323  | 0.107108  | 2.56844e-05 | 1323       | ebi-a-GCST90010240 | rs73346992  | T             | C            | 0.038     | id:ebi-a-GCST90010240 | True      | reported    | igd         | 0.01347545<br>40889564 | 18.0442290<br>313945 |
| 18        | 13309360  | -1.27612  | 0.302311  | 3.03284e-05 | 1323       | ebi-a-GCST90010240 | rs1377813   | A             | G            | 0.004     | id:ebi-a-GCST90010240 | True      | reported    | igd         | 0.01328939<br>11448849 | 17.7917269<br>205835 |
| 18        | 59122150  | 0.405104  | 0.0920885 | 1.37499e-05 | 1323       | ebi-a-GCST90010240 | rs76364944  | C             | T            | 0.05      | id:ebi-a-GCST90010240 | True      | reported    | igd         | 0.01441636<br>94181151 | 19.3225855<br>324794 |
| 19        | 50555544  | 0.234335  | 0.0570645 | 4.69818e-05 | 1323       | ebi-a-GCST90010240 | rs4802650   | T             | C            | 0.137     | id:ebi-a-GCST90010240 | True      | reported    | igd         | 0.01258582<br>81534401 | 16.8377966<br>052506 |
| 19        | 34744263  | -0.716741 | 0.151443  | 2.92907e-06 | 1323       | ebi-a-GCST90010240 | rs77592306  | G             | A            | 0.018     | id:ebi-a-GCST90010240 | True      | reported    | igd         | 0.01664849<br>69160961 | 22.3650081<br>96145  |
| 20        | 17525361  | -1.89948  | 0.403006  | 3.39602e-06 | 1323       | ebi-a-GCST90010240 | rs147292136 | T             | C            | 0.002     | id:ebi-a-GCST90010240 | True      | reported    | igd         | 0.01651409<br>28901393 | 22.1814227<br>841672 |
| 20        | 16981324  | -1.5789   | 0.374661  | 3.21959e-05 | 1323       | ebi-a-GCST90010240 | rs532347711 | G             | A            | 0.003     | id:ebi-a-GCST90010240 | True      | reported    | igd         | 0.01324589<br>68985423 | 17.7327155<br>245436 |
| 21        | 27376344  | -0.512873 | 0.122319  | 3.31627e-05 | 1323       | ebi-a-GCST90010240 | rs71317448  | A             | G            | 0.029     | id:ebi-a-GCST90010240 | True      | reported    | igd         | 0.01311411<br>30491271 | 17.5539477<br>937222 |
| 22        | 48795422  | 0.395382  | 0.0880627 | 1.41746e-05 | 1323       | ebi-a-GCST90010240 | rs147856022 | T             | C            | 0.054     | id:ebi-a-GCST90010240 | True      | reported    | igd         | 0.01500799<br>42901794 | 20.1276359<br>020193 |
| 22        | 23407512  | -0.739072 | 0.175681  | 3.11157e-05 | 1323       | ebi-a-GCST90010240 | rs76003838  | A             | G            | 0.014     | id:ebi-a-GCST90010240 | True      | reported    | igd         | 0.01320057<br>80999327 | 17.6712341<br>768853 |

(3) Supplementary Table S3. MR results

| id.exposure        | id.outcome       | outcome                                | exposure              | method                    | nsnp | b        | se       | pval     | lo_ci    | up_ci    | or       | or_lci95 | or_uci95 |
|--------------------|------------------|----------------------------------------|-----------------------|---------------------------|------|----------|----------|----------|----------|----------|----------|----------|----------|
| ebi-a-GCST90010240 | ebi-a-GCST006908 | Ischemic stroke    id:ebi-a-GCST006908 | id:ebi-a-GCST90010240 | MR Egger                  | 72   | 0.017127 | 0.011221 | 0.131417 | -0.00487 | 0.03912  | 1.017275 | 0.995146 | 1.039895 |
| ebi-a-GCST90010240 | ebi-a-GCST006908 | Ischemic stroke    id:ebi-a-GCST006908 | id:ebi-a-GCST90010240 | Weighted median           | 72   | 0.019186 | 0.010021 | 0.055545 | -0.00046 | 0.038827 | 1.019371 | 0.999545 | 1.03959  |
| ebi-a-GCST90010240 | ebi-a-GCST006908 | Ischemic stroke    id:ebi-a-GCST006908 | id:ebi-a-GCST90010240 | Inverse variance weighted | 72   | 0.013286 | 0.006595 | 0.043959 | 0.000359 | 0.026213 | 1.013375 | 1.000359 | 1.026559 |
| ebi-a-GCST90010240 | ebi-a-GCST006908 | Ischemic stroke    id:ebi-a-GCST006908 | id:ebi-a-GCST90010240 | Simple mode               | 72   | 0.017885 | 0.020351 | 0.382455 | -0.022   | 0.057773 | 1.018046 | 0.978238 | 1.059474 |
| ebi-a-GCST90010240 | ebi-a-GCST006908 | Ischemic stroke    id:ebi-a-GCST006908 | id:ebi-a-GCST90010240 | Weighted mode             | 72   | 0.023335 | 0.013747 | 0.093998 | -0.00361 | 0.050279 | 1.023609 | 0.996397 | 1.051564 |

(4) Supplementary Table S4. Pleiotropy

| id.exposure        | id.outcome       | outcome                                | exposure              | egger_intercept | se       | pval     |
|--------------------|------------------|----------------------------------------|-----------------------|-----------------|----------|----------|
| ebi-a-GCST90010240 | ebi-a-GCST006908 | Ischemic stroke    id:ebi-a-GCST006908 | id:ebi-a-GCST90010240 | -0.00173        | 0.004085 | 0.672538 |

(5) Supplementary Table S5. heterogeneity

| id.exposure        | id.outcome       | outcome                                | exposure              | method   | Q        | Q_df | Q_pval   |
|--------------------|------------------|----------------------------------------|-----------------------|----------|----------|------|----------|
| ebi-a-GCST90010240 | ebi-a-GCST006908 | Ischemic stroke    id:ebi-a-GCST006908 | id:ebi-a-GCST90010240 | MR Egger | 72.82633 | 70   | 0.385173 |
| ebi-a-GCST90010240 | ebi-a-GCST006908 | Ischemic stroke    id:ebi-a-GCST006908 | id:ebi-a-GCST90010240 | IVW      | 73.01377 | 71   | 0.411662 |
